# Supplementary material
Source: Springer Nature journal article supplement (https://www.springermedizin.de/resource/supplementary/13075_2009_2775_MOESM3_ESM.pdf/9692858)

**CIA Prev:**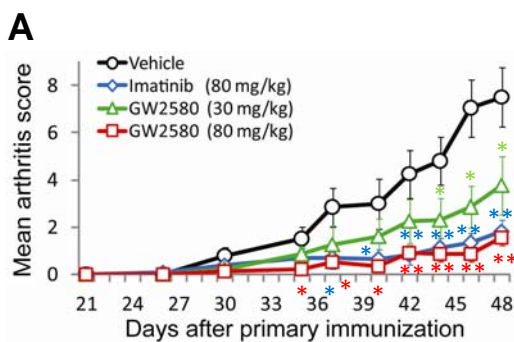**B**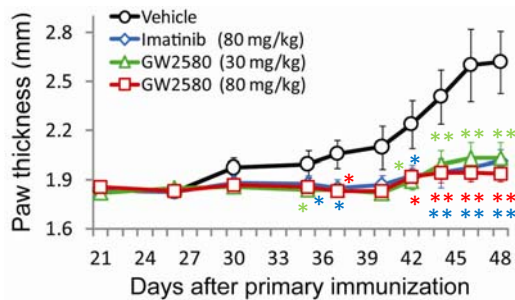**CIA Treat:**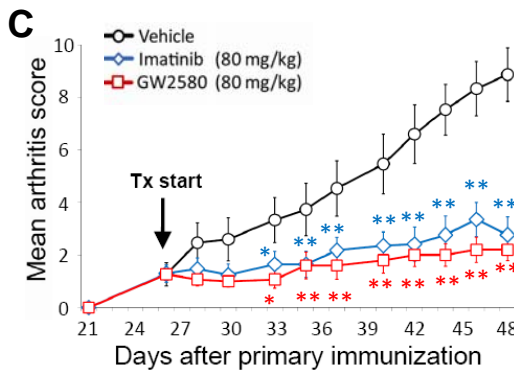**D**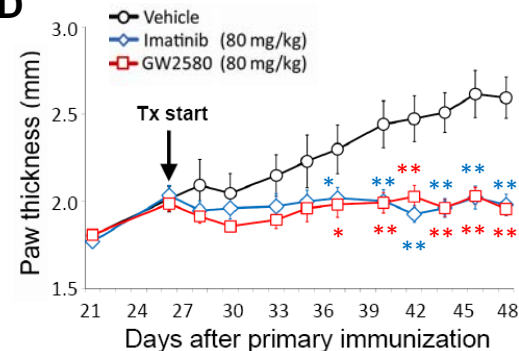**CAIA:**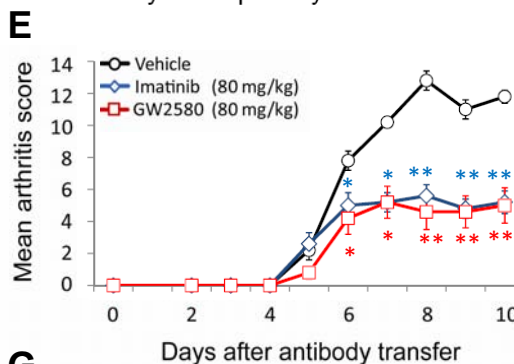**F**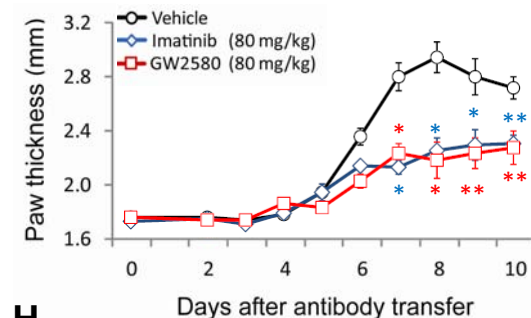**K/BxN:**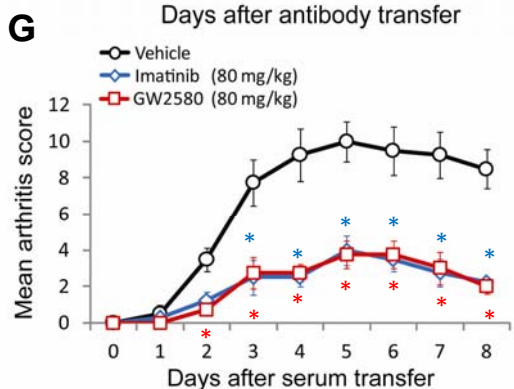**H**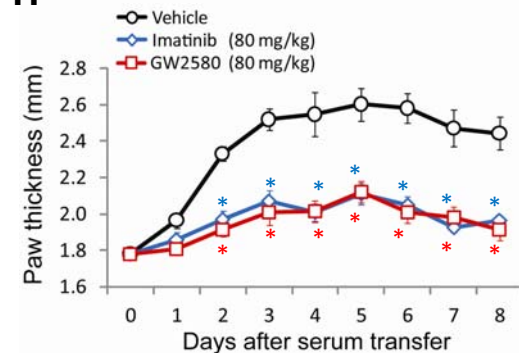

Supplement: MOESM3 [file 9692858]
